# Supplementary material for: Dominance and parent-of-origin effects of coding and non-coding alleles at the acylCoA-diacylglycerol-acyltransferase (DGAT1) gene on milk production traits in German Holstein cows
Source: PubMed Central journal article supplement (PMC2129099; doi:10.1186/1471-2156-8-62), 2007-09-24
Supplement: 1471-2156-8-62-S1.pdf [file 1471-2156-8-62-S1.pdf]

**Table 3 - Least square mean values (S.E.) for milk production traits for *DGAT1* genotypes in a German Holstein cow data set**

| <i>DGAT1</i><br>genotype <sup>a</sup> | Milk yield      |                  | Milk fat content    |                     | Milk fat yield  |                 | Milk protein content |                     | Milk protein yield |                 |
|---------------------------------------|-----------------|------------------|---------------------|---------------------|-----------------|-----------------|----------------------|---------------------|--------------------|-----------------|
|                                       | [kg]            |                  | [%]                 |                     | [kg]            |                 | [%]                  |                     | [kg]               |                 |
| model <sup>b</sup>                    | I               | II               | I                   | II                  | I               | II              | I                    | II                  | I                  | II              |
| <i>K/K</i>                            | 605.1<br>(49.0) | 690.0<br>(70.2)  | 0.088<br>(0.0178)   | 0.1057<br>(0.0253)  | 32.45<br>(1.93) | 37.26<br>(2.77) | 0.0286<br>(0.0082)   | 0.038<br>(0.0119)   | 22.66<br>(1.46)    | 26.22<br>(2.08) |
| <i>A/K</i>                            | 743.0<br>(22.2) | 774.7<br>(35.6)  | -0.0175<br>(0.008)  | -0.0117<br>(0.0128) | 29.33<br>(0.87) | 31.06<br>(1.4)  | 0.0011<br>(0.0037)   | 0.0062<br>(0.006)   | 24.95<br>(0.66)    | 26.4<br>(1.05)  |
| <i>A/A</i>                            | 997.3<br>(24.5) | 987.5<br>(28.1)  | -0.2411<br>(0.0089) | -0.2438<br>(0.0101) | 21.09<br>(0.96) | 20.5<br>(1.11)  | -0.0482<br>(0.0041)  | -0.0501<br>(0.0047) | 29.42<br>(0.73)    | 28.92<br>(0.84) |
| <i>p</i>                              | <0.0001         | <0.0001          | <0.0001             | <0.0001             | <0.0001         | <0.0001         | <0.0001              | <0.0001             | <0.0001            | 0.13            |
| <i>1/3</i>                            |                 | 799.4<br>(104.8) |                     | -0.1435<br>(0.0379) |                 | 21.19<br>(4.14) |                      | -0.0081<br>(0.0178) |                    | 26.06<br>(3.12) |
| <i>1/4</i>                            |                 | 812.0<br>(116.9) |                     | -0.1234<br>(0.0422) |                 | 23.24<br>(4.62) |                      | 0.0125<br>(0.0198)  |                    | 28.27<br>(3.48) |
| <i>2/2</i>                            |                 | 809.3<br>(153.1) |                     | 0.0341<br>(0.0553)  |                 | 36.58<br>(6.05) |                      | -0.0084<br>(0.026)  |                    | 26.27<br>(4.55) |
| <i>2/3</i>                            |                 | 907.7<br>(48.9)  |                     | -0.0888<br>(0.0176) |                 | 30.14<br>(1.93) |                      | -0.0217<br>(0.0083) |                    | 28.62<br>(1.45) |
| <i>2/4</i>                            |                 | 770.2<br>(75.3)  |                     | -0.0585<br>(0.0272) |                 | 26.94<br>(2.97) |                      | 0.0005<br>(0.0127)  |                    | 25.82<br>(2.24) |
| <i>2/5</i>                            |                 | 691.3<br>(74.1)  |                     | 0.0253<br>(0.0268)  |                 | 31.12<br>(2.93) |                      | 0.0329<br>(0.0125)  |                    | 25.85<br>(2.2)  |
| <i>3/3</i>                            |                 | 731.4<br>(36.1)  |                     | -0.0666<br>(0.013)  |                 | 24.83<br>(1.42) |                      | -0.0112<br>(0.0061) |                    | 23.6<br>(1.07)  |
| <i>3/4</i>                            |                 | 820.5<br>(40.1)  |                     | -0.0799<br>(0.0145) |                 | 27.35<br>(1.58) |                      | -0.0103<br>(0.0068) |                    | 26.68<br>(1.19) |
| <i>3/5</i>                            |                 | 712.0<br>(45.2)  |                     | 0.009<br>(0.0163)   |                 | 30.08<br>(1.78) |                      | 0.0061<br>(0.0076)  |                    | 24.23<br>(1.34) |
| <i>4/4</i>                            |                 | 1162.6<br>(86.8) |                     | -0.126<br>(0.0313)  |                 | 36.48<br>(3.43) |                      | -0.0238<br>(0.0147) |                    | 36.83<br>(2.58) |
| <i>4/5</i>                            |                 | 813.5<br>(66.5)  |                     | -0.0102<br>(0.024)  |                 | 32.75<br>(2.62) |                      | 0.0158<br>(0.0112)  |                    | 28.58<br>(1.97) |
| <i>5/5</i>                            |                 | 778.5<br>(108.0) |                     | 0.0292<br>(0.039)   |                 | 34.58<br>(4.27) |                      | -0.0074<br>(0.0183) |                    | 25.35<br>(3.21) |
| <i>p</i>                              |                 | 0.0003           |                     | <0.0001             |                 | 0.022           |                      | 0.0112              |                    | 0.0033          |

<sup>a</sup> Allele coding: K: *DGAT1* 232K, A: *DGAT1* 232A; 1, 2, 3, 4, 5: alleles at the *DGAT1* promoter VNTR; <sup>b</sup> model I: sub model see eq. 2 in Methods, model II: full model see eq. 2 in Methods
